# Supplementary material
Source: MDPI journal article supplement (https://www.mdpi.com/2071-1050/13/16/9417)
Supplement: s1 [file s1]

## Supplementary Materials

*Questionnaire (enclosed questionnaire is only a part of full research)*

In September 2019 authorities of University of Economics in Katowice along with authorities of other 60 polish universities have signed the University Social Responsibility Declaration. It is a new programme, initiated in Poland in 2017. The aim of this survey is to identification among students of this University their knowledge about this programme, its rules, importance and actions taken by the University. The survey is anonymous. Results will be used for scientific purposes only.

1. Have you ever heard about the University Social Responsibility Declaration

- Yes
- No

(...)

4. To what extent, in your opinion, universities which sign such a declaration should achieve mentioned objectives?

|                                                                                                                    | To a very low extent | To a low extent | Neither to a high nor low extent | To a high extent | To a very high extent |
|--------------------------------------------------------------------------------------------------------------------|----------------------|-----------------|----------------------------------|------------------|-----------------------|
| Creation of knowledge about the surrounding reality                                                                |                      |                 |                                  |                  |                       |
| Transfer of knowledge about the surrounding reality                                                                |                      |                 |                                  |                  |                       |
| Building of awareness about the role of university in creation of conditions for country's sustainable development |                      |                 |                                  |                  |                       |
| Dissemination of academic values                                                                                   |                      |                 |                                  |                  |                       |
| Popularization of science among society                                                                            |                      |                 |                                  |                  |                       |
| Promotion of sustainable development and social responsibility in scientific research                              |                      |                 |                                  |                  |                       |
| Promotion of sustainable development and social responsibility in scientific research                              |                      |                 |                                  |                  |                       |
| Promotion of sustainable development and social responsibility in management and organizational solutions          |                      |                 |                                  |                  |                       |

5. Rate the importance of specific principles of the University Social Responsibility Declaration for you:

|                                                                                                                                                   | Not at all<br>important | Slightly<br>important | Moderat<br>ely<br><i>important</i> | Very<br><i>important</i> | Extremely<br>important |
|---------------------------------------------------------------------------------------------------------------------------------------------------|-------------------------|-----------------------|------------------------------------|--------------------------|------------------------|
| Care of academic values e.g. those mentioned in Ethical Code of Academic Worker                                                                   |                         |                       |                                    |                          |                        |
| Creation of social and civic attitudes of future elits towards building of work ethics                                                            |                         |                       |                                    |                          |                        |
| Dissemination of ideas of equal opportunities, diversity, tolerance and respect for human rights                                                  |                         |                       |                                    |                          |                        |
| Extension of education programmes of issues related to ethics and corporate social responsibility, sustainable development and social innovations |                         |                       |                                    |                          |                        |
| Undertake projects implementing principles of social responsibility in the process of University management                                       |                         |                       |                                    |                          |                        |
| Undertake of national and international cooperation (with universities, companies, NGO's) in terms of scientific research and implementation work |                         |                       |                                    |                          |                        |
| Development of national and international intercollegiate cooperation in terms of exchange of social responsibility models                        |                         |                       |                                    |                          |                        |
| Care of univerisity's organizational order in strategies and actions based on principles of University Social Reponsibility                       |                         |                       |                                    |                          |                        |
| Providing transparency of university's activity                                                                                                   |                         |                       |                                    |                          |                        |
| Activity of academic community and their stakeholders in a way that minimize its negative impact on natural environment                           |                         |                       |                                    |                          |                        |
| Dialogue with stakeholders about priorities of USR policy and provide information about its results                                               |                         |                       |                                    |                          |                        |
| Submitting the rules of ethics and responsibility in education and research processes                                                             |                         |                       |                                    |                          |                        |

(...)

10. State, to what extent do you use principles of social responsibility in your everyday life:

- Very low
- Low
- Neither big nor low
- High
- Very High

11. Gender:

- Men
- Women

12. Age:

- under 20 years old
- 21-22
- 23-24
- 25-26
- 27-28
- 29-30
- 31 and older

13. Year and type of study:

- 1st year of Bachelor studies
- 2nd year of Bachelor studies
- 3rd year of Bachelor studies
- 1st year of Master studies
- 2nd year of Master studies
- Doctoral studies
- Postgraduate studies

14. Mode of study:

- Full-time studies
- Part-time studies

15. Professional activity:

- Full time job
- Part time job
- Unemploy
